# Supplementary material for: Comparative Study of Different Diagnostic Routine Methods for the Identification of Acinetobacter radioresistens
Source: MDPI journal article supplement (doi:10.3390/microorganisms10091767), 2022-08-31
Supplement: s1 [file s1]

Supplementary Table S1: Primer sequences used in this study

| Name      | Forward (f)/Reverse (r)<br>Primer | Primer sequence             | Reference |
|-----------|-----------------------------------|-----------------------------|-----------|
| 16s-DNA-F | f                                 | 3'-AGAGTTTGATCMTGGCTCAG-5'  | [17]      |
| 16s DNA-R | r                                 | 3'-ACGGHTACCTTGTTACGACTT-5' | [17]      |
| Ac696F    | f                                 | 3'-AGAGTTTGATCMTGGCTCAG-5'  | [18]      |
| Ac109R    | r                                 | 3'-ACGGHTACCTTGTTACGACTT-5' | [18]      |
