# Supplementary material for: Comparative Study of Different Diagnostic Routine Methods for the Identification of Acinetobacter radioresistens
Source: MDPI journal article supplement (doi:10.3390/microorganisms10091767), 2022-08-31
Supplement: s1 [file s1]

Supplementary Table S2: PCR Cycling Protocols

| Temperature | Time    | Comment              |
|-------------|---------|----------------------|
| 94°C        | 2 min   | Initial denaturation |
| 94°C        | 30 sec  | Cycle: denaturation  |
| 52°C        | 30 sec. | Cycle: annealing     |
| 72°C        | 1 min   | Cycle: elongation    |
| 72°C        | 7 min   | Termination          |
| 4°C         | ∞       | Hold                 |

35 cycles

Protocol for *rpoB* gene sequencing
