# Supplementary material for: Comparative Study of Different Diagnostic Routine Methods for the Identification of Acinetobacter radioresistens
Source: MDPI journal article supplement (doi:10.3390/microorganisms10091767), 2022-08-31
Supplement: s1 [file s1]

Supplementary Table S4: Results obtained from VITEK 2

| Strain     | ILATk | TyrA | MNT | ILATa | Identification:                    |
|------------|-------|------|-----|-------|------------------------------------|
| DSM 108719 | +     | +    | +   | -     | Acinetobacter radioresistens (99%) |
| DSM 108296 | +     | +    | +   | -     | Acinetobacter radioresistens (99%) |
| DSM 108249 | +     | +    | +   | -     | Acinetobacter radioresistens (99%) |
| DSM 108290 | +     | +    | +   | -     | Acinetobacter radioresistens (99%) |
| DSM 108297 | +     | +    | +   | -     | Acinetobacter radioresistens (99%) |
| DSM 108291 | +     | +    | +   | -     | Acinetobacter radioresistens (99%) |
| DSM 108289 | +     | +    | +   | -     | Acinetobacter radioresistens (99%) |
| DSM 108293 | +     | +    | +   | -     | Acinetobacter radioresistens (99%) |
| DSM 108295 | +     | +    | +   | +     | Acinetobacter radioresistens (99%) |
| DSM 108292 | +     | +    | +   | -     | Acinetobacter radioresistens (99%) |
| DSM 108294 | +     | +    | +   | +     | Acinetobacter radioresistens (99%) |
| DSM 108820 | +     | +    | -   | -     | Acinetobacter lwoffii (99%)        |
| DSM 109007 | +     | +    | -   | -     | Low discrimination                 |
| DSM 109999 | +     | +    | -   | +     | Acinetobacter lwoffii (99%)        |
| DSM 108297 | +     | +    | +   | +     | Acinetobacter radioresistens (99%) |
| DSM 108349 | +     | +    | +   | -     | Acinetobacter radioresistens (99%) |
| K 50-62    | +     | +    | +   | -     | Acinetobacter radioresistens (99%) |
| K 51-37    | +     | +    | -   | -     | Low discrimination                 |

|           |   |   |   |   |                                    |
|-----------|---|---|---|---|------------------------------------|
| LH 5      | + | + | + | - | Acinetobacter radioresistens (99%) |
| LH 6      | + | + | + | - | Acinetobacter radioresistens (99%) |
| R 866 BER | + | + | + | - | Acinetobacter radioresistens (99%) |

+ Positive result, - negative result, substances which have been tested, but were negative in all isolates are not shown
