# Supplementary material for: Comparative Study of Different Diagnostic Routine Methods for the Identification of Acinetobacter radioresistens
Source: MDPI journal article supplement (doi:10.3390/microorganisms10091767), 2022-08-31

Supplementary Table S3

| Temprrature | Time   | Comment              |
|-------------|--------|----------------------|
| 95°C        | 5 min  | Initial denaturation |
| 95°C        | 1 min  | Cycle: denaturation  |
| 50°C        | 1 min. | Cycle: annealing     |
| 72°C        | 90 sec | Cycle: elongation    |
| 72°C        | 7 min  | Termination          |
| 4°C         | ∞      | Hold                 |

Protocol for *16s rDNA* Gene sequencing

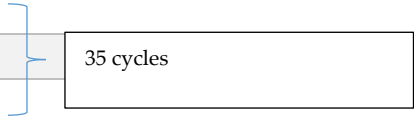

Supplement: s1 [file s1]
